# Supplementary material for: Abrupt elastic-to-plastic transition in pentagonal nanowires under bending
Source: publisher site journal article supplement (doi:10.3762/bjnano.10.237), 2019-12-12
Supplement: Additional file 1 [file 2190-4286-10-237-S1.pdf]

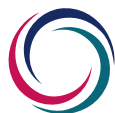

## Supporting Information

for

### **Abrupt elastic-to-plastic transition in pentagonal nanowires under bending**

Sergei Vlassov, Magnus Mets, Boris Polyakov, Jianjun Bian, Leonid Dorogin and Vahur Zadin

*Beilstein J. Nanotechnol.* **2019**, *10*, 2468–2476. [doi:10.3762/bjnano.10.237](https://doi.org/10.3762/bjnano.10.237)

### **Additional figures and a video link**

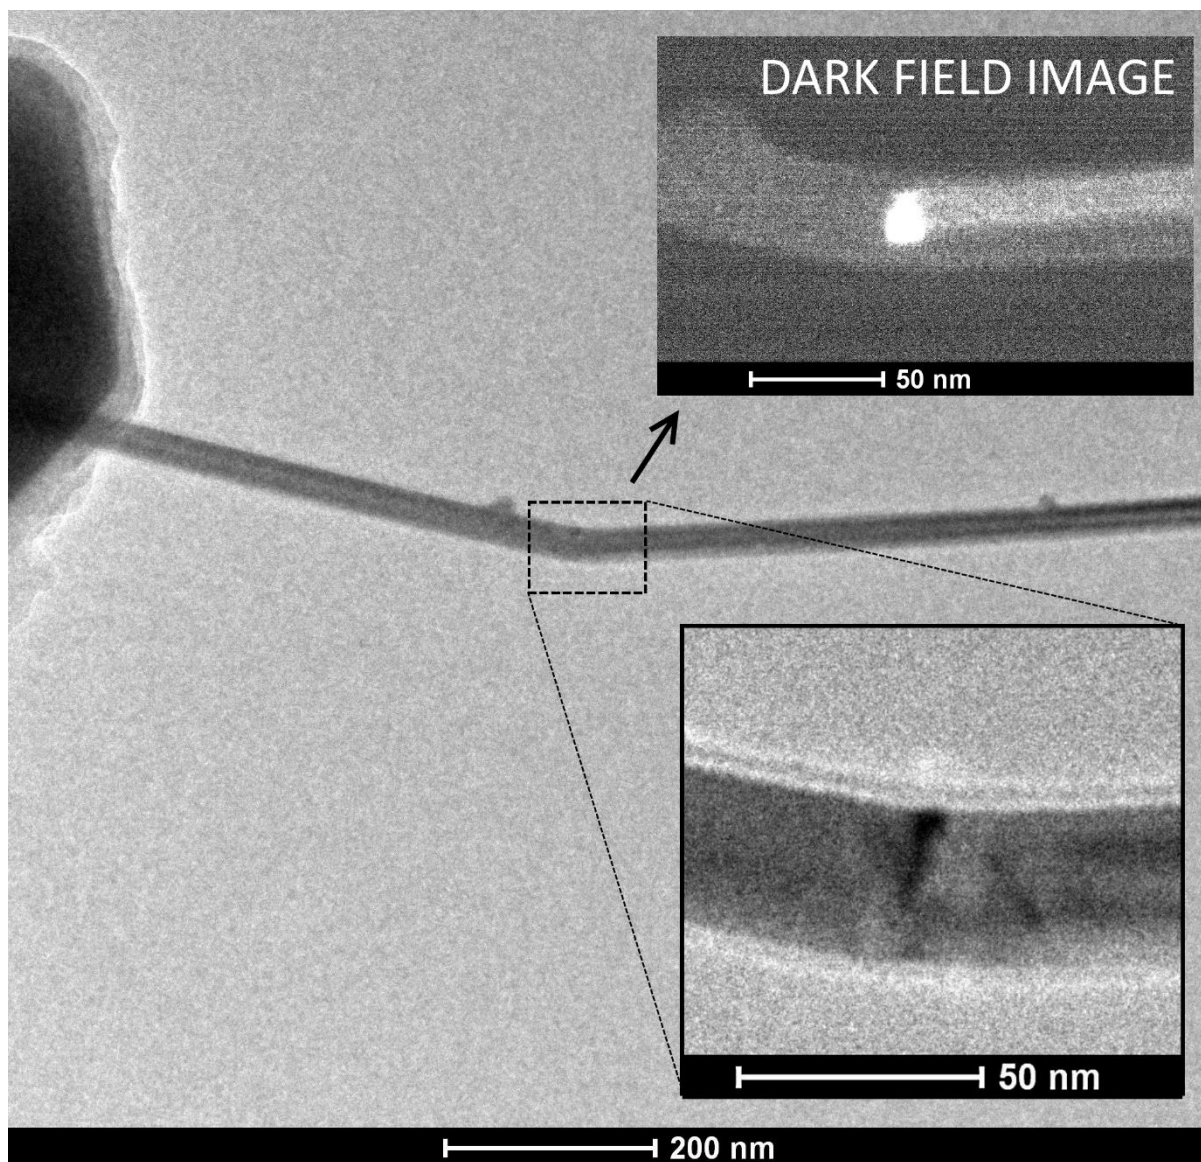

**Figure S1:** Bright and dark field TEM images of Ag nanowire previously bent inside SEM by nanomanipulator.

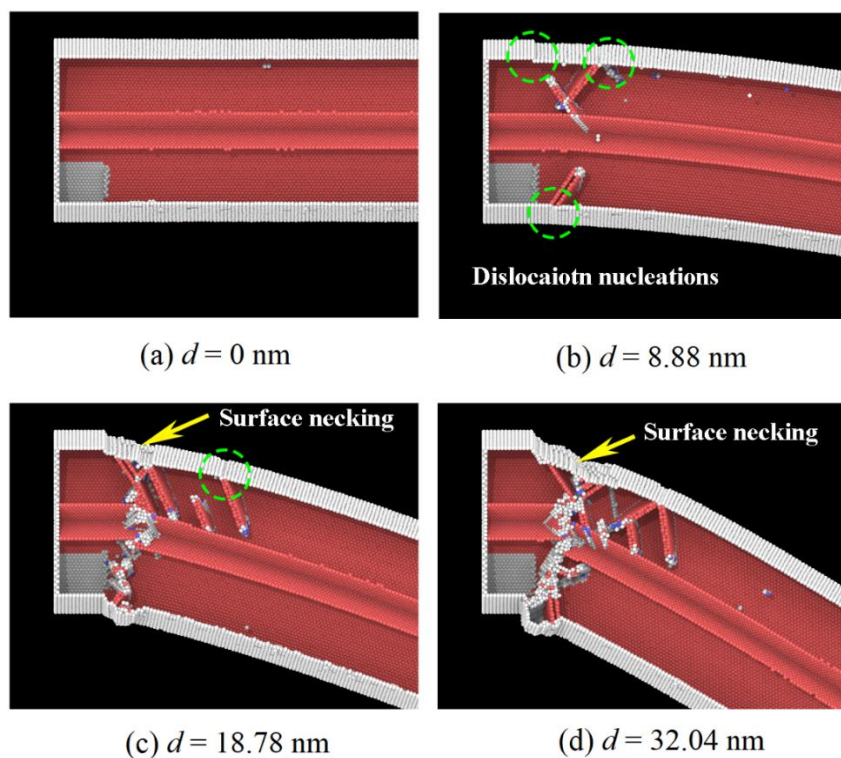

**Figure S2:** Dislocation structures of the Ag fivefold nanowire in a quasi-static simulation. (Red atoms are twin boundaries and stacking faults, while atoms are dislocation cores and free surfaces. Atoms in perfect lattice are not shown for clearness).

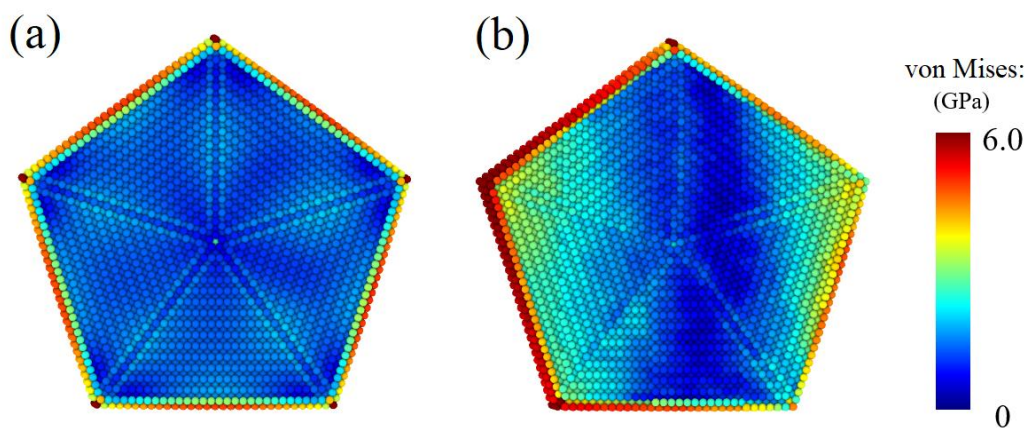

**Figure S3:** Stress distribution of the Ag nanowire at the initial stage (a) and the stage before the first dislocation nucleation (b).

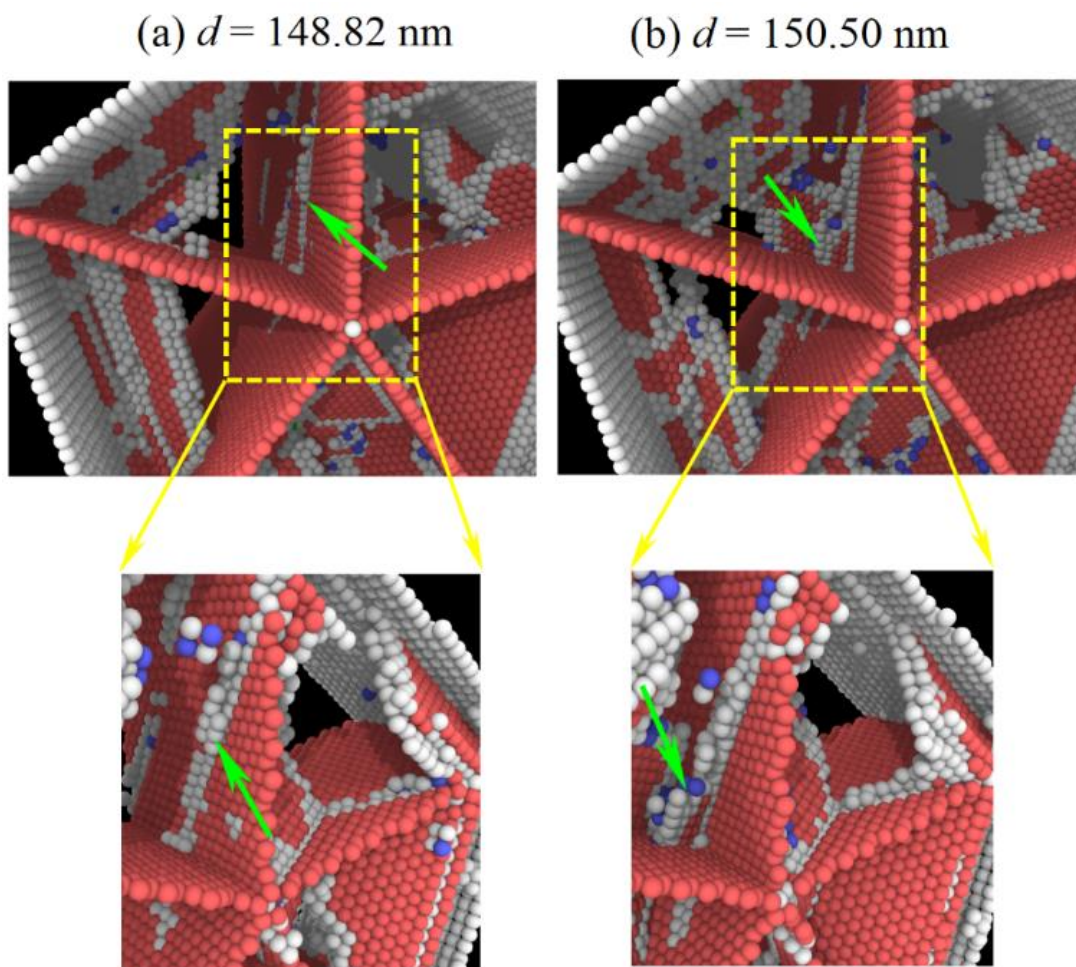

**Figure S4:** Dislocation cross-slip a twin boundary. (Atom color scheme is the same to that in Figure S2)

Video: Bending of pentagonal Ag nanowire, MD simulations.

<https://1drv.ms/u/s!AuJGTOFjxvz2hAjtbdQKcwr-yY4f?e=kyPlcF>
